# Supplementary material for: Two new genera of songbirds represent endemic radiations from the Shola Sky Islands of the Western Ghats, India
Source: PubMed Central journal article supplement (PMC5259981; doi:10.1186/s12862-017-0882-6), 2017-01-23
Supplement: 12862_2017_882_MOESM1_ESM.pdf [file 12862_2017_882_MOESM1_ESM.pdf]

Electronic supplemental material for Robin et al. Two new songbird genera represent endemic radiations from the Western Ghats of India

**Table S1.** Samples used to reconstruct *Montecincla* phylogeny. All individuals of *Montecincla* were used for the within-species phylogeny but only the samples in bold were included in the higher-level analysis.

| Species                                     | Sample Number       | Voucher Number | Locality        | Gene            |                 |                 |                 |                 |
|---------------------------------------------|---------------------|----------------|-----------------|-----------------|-----------------|-----------------|-----------------|-----------------|
|                                             |                     |                |                 | ND3             | CYTB            | TGF             | FIB5            | MUSK            |
| Bankit ID                                   |                     |                |                 |                 | <b>1815018</b>  |                 |                 |                 |
| <b><i>M. jerdoni</i></b>                    | <b>glt1</b>         | <b>159101</b>  | <b>Banasura</b> | <b>KR083653</b> | <b>KR083635</b> | <b>KY451860</b> | <b>KR083673</b> | <b>KR083715</b> |
| <i>M. jerdoni</i>                           | glt2                | 159102         | Banasura        | KR083661        | KR083633        | <b>KY451861</b> | KR083687        | KR083699        |
| <i>M. jerdoni</i>                           | glt3                | 159107         | Banasura        | KR083668        | KR083636        | <b>KY451862</b> | KR083688        | KR083701        |
| <i>M. jerdoni</i>                           | glt4                | 159189         | Ambalapara      | KR083665        | KR083634        | <b>KY451863</b> | KR083675        | KR083711        |
| <b><i>M. cachinans</i></b>                  | <b>glt5</b>         | <b>159152</b>  | <b>Sispara</b>  | <b>KR083658</b> | <b>KR083631</b> | <b>KY451864</b> | <b>KR083689</b> | <b>KR083708</b> |
| <i>M. cachinans</i>                         | glt6                | 159153         | Sispara         | KR083666        | KR083647        | <b>KY451865</b> | KR083684        | KR083697        |
| <i>M. cachinans</i>                         | glt7                | 159155         | Sispara         | KR083655        | KR083632        | <b>KY451866</b> | KR083676        | KR083704        |
| <i>M. cachinans</i>                         | glt8                | 159156         | Sispara         | KR083669        | KR083641        | <b>KY451867</b> | KR083694        | KR083703        |
| <i>M. cachinans</i>                         | glt9                | kt6            | Kotagiri        |                 | KY462741        |                 |                 |                 |
| <i>M. cachinans</i>                         | glt10               | kt7            | Kotagiri        |                 | KR083638        |                 |                 |                 |
| <i>M. fairbanki</i>                         | glt11               | 1897           | Kodi            | KR083657        | KR083650        |                 | KR083685        | KR083698        |
| <i>M. fairbanki</i>                         | glt12               | 1899           | Kodi            | KR083670        | KR083644        |                 | KR083674        | KR083705        |
| <i>M. fairbanki</i>                         | glt13               | 1900           | Kodi            |                 | KY462742        |                 | KR083693        |                 |
| <i>M. fairbanki</i>                         | glt14               | 2034           | Kodi            |                 | KR083651        |                 | KR083677        |                 |
| <b><i>M. fairbanki</i></b>                  | <b>glt15</b>        | <b>2095</b>    | <b>Munnar</b>   | <b>KR083671</b> | <b>KR083649</b> | <b>KY451868</b> | <b>KR083686</b> | <b>KR083700</b> |
| <i>M. fairbanki</i>                         | glt16               | 2096           | Munnar          | KR083662        | KR083645        | <b>KY451869</b> | KR083679        | KR083706        |
| <i>M. fairbanki</i>                         | glt17               | 2097           | Munnar          |                 | KY462743        |                 | KR083690        |                 |
| <i>M. fairbanki</i>                         | glt18               | 159201         | Munnar          |                 | KR083643        |                 | KR083680        |                 |
| <i>M. fairbanki</i>                         | glt19               | 1484           | High Wavies     | KR083659        | KR083640        | KY451870        | KR083678        | KR083714        |
| <i>M. fairbanki</i>                         | glt20               | 2046           | High Wavies     | KR083652        | KR083630        | KY451871        | KR083692        | KR083702        |
| <i>M. fairbanki</i>                         | glt21               | 2047           | High Wavies     | KR083656        | KR083639        | KY451872        | KR083683        | KR083713        |
| <i>M. fairbanki</i>                         | glt22               | 2048           | High Wavies     | KR083667        | KR083642        | KY451873        | KR083672        | KR083710        |
| <i>M. meridionalis</i>                      | glt23               | 159133         | Peppara         | KR083654        | KR083648        | KY451874        | KR083695        | KR083696        |
| <i>M. meridionalis</i>                      | glt24               | 159134         | Peppara         | KR083664        | KR083646        |                 | KR083681        | KR083707        |
| <b><i>M. meridionalis</i></b>               | <b>glt25</b>        | <b>159138</b>  | <b>Peppara</b>  | <b>KR083660</b> | <b>KR083637</b> | <b>KY451875</b> | <b>KR083682</b> | <b>KR083712</b> |
| <i>M. meridionalis</i>                      | glt26               | 159139         | Peppara         | KR083663        | KR083629        | <b>KY451876</b> | KR083691        | KR083709        |
| <i>Ianthocincla [Dryonastes] delesserti</i> | WLT1                | 74021          |                 | KY462752        | KJ702948        |                 | KT002691        | KM378648        |
| <i>Ianthocincla [Dryonastes] delesserti</i> | WLT2                | 74019          |                 | KY462753        | KJ702940        |                 | KT002689        | KM378644        |
| <b>[from published studies]</b>             |                     |                |                 |                 |                 |                 |                 |                 |
| <i>Actinodura [Chrysomina] strigula</i>     | <i>KUNHM 15184</i>  |                | Myanmar         | JN826858        | JN827120        | JN826343        | JN826092        | JN825849        |
| <i>Actinodura [Siva] cyanouroptera</i>      | <i>KUNHM 11281</i>  |                | China           | JN826856        | JN827118        | JN826341        | JN826090        | JN825847        |
| <i>Actinodura egertoni</i>                  | <i>KUNHM 15098</i>  |                | Myanmar         | JN826715        | JN826988        | JN826213        | JN825968        | JN825741        |
| <i>Actinodura morrisoniana</i>              | <i>AMNH DOT5226</i> |                | Taiwan          | JN826718        | JN826992        | JN826217        | JN825971        | -               |
| <i>Actinodura nipalensis</i>                | <i>AMNH DOT5594</i> |                | Nepal           | JN826719        | JN826993        | JN826218        | -               | -               |
| <i>Actinodura ramsayi</i>                   | <i>AMNH DOT2629</i> |                | Vietnam         | JN826721        | JN826995        | JN826219        | JN825972        | JN825743        |
| <i>Actinodura waldeni</i>                   | <i>CAS 95491</i>    |                | China           | JN826723        | JN826997        | JN826221        | JN825974        | JN825745        |
| <i>Alcippe brunneicauda</i>                 | <i>KUNHM 17766</i>  |                | Borneo          | JN826726        | JN827000        | JN826224        | JN825977        | JN825748        |
| <i>Alcippe grotei</i>                       | <i>AMNH</i>         |                | Vietnam         | JN826728        | JN827002        | JN826226        | JN825978        | JN825749        |
| <i>Alcippe morrisonia</i>                   | <i>KUNHM 6662</i>   |                | China           | JN826730        | JN827004        | JN826228        | JN825981        | JN825751        |
| <i>Alcippe nipalensis</i>                   | <i>KUNHM 15244</i>  |                | Myanmar         | JN826731        | JN827005        | JN826229        | JN825982        | JN825752        |
| <i>Alcippe peracensis</i>                   | <i>AMNH</i>         |                | Vietnam         | JN826733        | JN827007        | JN826231        | JN825984        | JN825753        |
| <i>Alcippe poioicephala</i>                 | <i>USNM 6060</i>    |                | Myanmar         | JN826735        | JN827009        | JN826233        | JN825986        | JN825756        |
| <i>Cutia nipalensis</i>                     | <i>USNM 475768</i>  |                | Vietnam         | JN826748        | -               | JN826244        | -               | -               |
| <i>Garrulax [Leucodioptron] canorus</i>     | <i>KUNHM 10389</i>  |                | China           | JN826760        | JN827023        | JN826253        | JN825998        | JN825769        |
| <i>Garrulax [Leucodioptron] taewanus</i>    | <i>T0276</i>        |                | Taiwan          |                 | FJ841474        |                 |                 |                 |
| <i>Garrulax [Stactocichla] merulinus</i>    | <i>KUNHM 15190</i>  |                | Myanmar         | JN826772        | JN827035        | JN826262        | JN826008        | JN825779        |
| <i>Garrulax leucolophus</i>                 | <i>KUNHM 15247</i>  |                | Myanmar         | JN826767        | JN827030        | JN826258        | JN826004        | JN825775        |
| <i>Garrulax maesi</i>                       | <i>KUNHM 10152</i>  |                | China           | JN826770        | JN827033        | JN826261        | JN826007        | JN825778        |
| <i>Garrulax milleti</i>                     | <i>AMNH</i>         |                | Vietnam         | JN826774        | JN827037        | JN826264        | JN826010        | -               |
| <i>Garrulax monileger</i>                   | <i>USNM 5596</i>    |                | Myanmar         | JN826778        | JN827042        | JN826268        | JN826015        | -               |
| <i>Garrulax palliatus</i>                   | <i>KUNHM 17732</i>  |                | Borneo          | JN826783        | JN827047        | JN826273        | JN826020        | -               |
| <i>Garrulax strepitans</i>                  | <i>3756</i>         |                | captive         |                 | JF804083        |                 |                 |                 |
| <i>Grammatoptila striata</i>                | <i>USNM 15255</i>   |                | Myanmar         | JN826790        | JN827054        | JN826280        | JN826027        | JN825793        |
| <i>Heterophasia [Malacias] auricularis</i>  | <i>AMNH DOT5177</i> |                | Taiwan          | JN826794        | JN827058        | JN826283        | JN826029        | JN825794        |
| <i>Heterophasia [Malacias] capistrata</i>   | <i>AMNH DOT5573</i> |                | Nepal           | JN826796        | JN827060        | JN826284        | JN826030        | JN825795        |
| <i>Heterophasia [Malacias] gracilis</i>     | <i>USNM 5683</i>    |                | Myanmar         | JN826797        | JN827061        | JN826285        | JN826031        | JN825796        |
| <i>Heterophasia [Malacias] melanoleuca</i>  | <i>CAS 95600</i>    |                | China           | JN826800        | JN827064        | JN826288        | JN826034        | JN825799        |
| <i>Heterophasia [Malacias] pulchella</i>    | <i>KUNHM 15166</i>  |                | Myanmar         | JN826803        | JN827067        | JN826291        | JN826037        | JN825801        |
| <i>Heterophasia picaoides</i>               | <i>USNM 15174</i>   |                | Myanmar         | JN826801        | JN827065        | JN826289        | JN826035        | JN825800        |

| Species                                         | Sample Number | Voucher Number | Locality     | Gene     |          |          |          |          |
|-------------------------------------------------|---------------|----------------|--------------|----------|----------|----------|----------|----------|
|                                                 |               |                |              | ND3      | CYTB     | TGF      | FIB5     | MUSK     |
| <i>Ianthocincla [Babax] lanceolata</i>          | KUNHM 11238   |                | China        | JN826737 | JN827011 | JN826234 | JN825987 | JN825758 |
| <i>Ianthocincla [Dryonastes] caerulata</i>      | 4531          |                | captive      |          | JF804104 |          |          |          |
| <i>Ianthocincla [Dryonastes] chinensis</i>      | KUNHM 10366   |                | China        | JN826761 | JN827024 | JN826254 | JN825999 | JN825770 |
| <i>Ianthocincla [Dryonastes] courtoisi</i>      | 1768          |                | captive      |          | JF804062 |          |          |          |
| <i>Ianthocincla [Dryonastes] nuchalis</i>       | USNM 15315    |                | Myanmar      | JN826780 | JN827044 | JN826270 | JN826017 | JN825785 |
| <i>Ianthocincla [Dryonastes] poecilorhyncha</i> | KUNHM 11128   |                | China        | JN826786 | JN827050 | JN826276 | JN826023 | JN825790 |
| <i>Ianthocincla [Garrulax] albogularis</i>      | AMNH DOT5626  |                | Nepal        | JN826759 | JN827022 | JN826252 | JN825997 | JN825768 |
| <i>Ianthocincla [Garrulax] pectoralis</i>       | KUNHM 11125   |                | China        | JN826784 | JN827048 | JN826274 | JN826021 | JN825788 |
| <i>Ianthocincla [Pterorhinus] sannio</i>        | KUNHM 11172   |                | China        | JN826787 | JN827051 | JN826277 | JN826024 | JN825791 |
| <i>Ianthocincla [Rhinocichla] mitrata</i>       | LSUNMS B36460 |                | Borneo       | FJ460844 | JN827041 | FJ460912 | JN826014 | JN825783 |
| <i>Ianthocincla cineracea</i>                   | KUNHM 11043   |                | China        | JN826762 | JN827025 | JN826255 | JN826000 | JN825771 |
| <i>Ianthocincla ocellata</i>                    | KUNHM 11342   |                | China        | JN826782 | JN827046 | JN826272 | JN826019 | JN825787 |
| <i>Leiothrix [Mesia] argentauris</i>            | KUNHM 15203   |                | Myanmar      | JN826820 | JN827083 | JN826306 | JN826054 | JN825814 |
| <i>Leiothrix lutea</i>                          | AMNH DOT6507  |                | Vietnam      | JN826822 | JN827085 | JN826308 | JN826056 | JN825816 |
| <i>Liocichla phoenicea</i>                      | KUNHM 10078   |                | China        | JN826825 | JN827088 | JN826311 | JN826059 | JN825819 |
| <i>Liocichla steerii</i>                        | AMNH DOT5178  |                | Taiwan       | JN826827 | JN827089 | JN826313 | JN826061 | JN825821 |
| <i>Malacopteron magnirostre</i>                 | KUNHM 12358   |                | Borneo       | JN826847 | JN827110 | JN826333 | JN826083 | JN825840 |
| <i>Minla [Leioptila] annectens</i>              | USNM 336017   |                | Thailand     | JN826745 |          | -        | -        | -        |
| <i>Minla ignotincta</i>                         | KUNHM 11346   |                | China        | JN826857 | JN827119 | JN826342 | JN826091 | JN825848 |
| <i>Pomatorhinus ferruginosus</i>                | KUNHM 15146   |                | Myanmar      | JN826890 | JN827151 | JN826372 | JN826124 | JN825877 |
| <i>Trochalopteron [Strophocincla] lineatum</i>  | FMNH 347872   |                | Pakistan     | JN826768 | JN827031 | JN826259 | JN826005 | JN825776 |
| <i>Trochalopteron [Strophocincla] virgatum</i>  | USNM 5627     |                | Myanmar      | JN826793 | JN827057 | JN826282 | JN826028 | -        |
| <i>Trochalopteron affine</i>                    | KUNHM 15099   |                | Myanmar      | JN826758 | JN827021 | -        | JN825996 | JN825767 |
| <i>Trochalopteron erythrocephalum</i>           | KUNHM 15193   |                | Myanmar      | JN826764 | JN827027 | JN826256 | JN826002 | JN825773 |
| <i>Trochalopteron formosum</i>                  | AMNH DOT9336  |                | captive      | JN826766 | JN827029 | JN826257 | JN826003 | JN825774 |
| <i>Trochalopteron milnei</i>                    | KUNHM 15101   |                | Myanmar      | JN826776 | JN827039 | JN826266 | JN826012 | JN825781 |
| <i>Trochalopteron squamatum</i>                 | KUNHM 15191   |                | Myanmar      | JN826788 | JN827052 | JN826278 | JN826025 | JN825792 |
| <i>Trochalopteron subunicolor</i>               | USNM 15264    |                | Myanmar      | JN826791 | JN827055 | JN826281 | -        | -        |
| <i>Trochalopteron variegatum</i>                | AMNH DOT5537  |                | Nepal        | JN826792 | JN827056 | -        | -        | -        |
| <i>Turdoides [Kupeornis] chapini</i>            | AMNH 348502   |                | Congo        | JN826819 | -        | -        | -        | -        |
| <i>Turdoides [Phyllanthus] atripennis</i>       | AMNH DOT2033  |                | Liberia      | JN826883 | JN827146 | JN826365 | JN826118 | -        |
| <i>Turdoides bicolor</i>                        | UWBM 70438    |                | South Africa | JN826969 | JN827219 | JN826438 | JN826190 | JN825943 |
| <i>Turdoides gularis</i>                        | USNM 5712     |                | Myanmar      | JN826971 | JN827221 | JN826440 | JN826192 | JN825945 |
| <i>Turdoides jardineii</i>                      | UWBM 52803    |                | South Africa | JN826973 | JN827223 | JN826442 | JN826194 | JN825947 |
| <i>Turdoides plebejus</i>                       | KUNHM 20025   |                | Sierra Leone | JN826974 | JN827224 | JN826443 | JN826195 | JN825948 |
| <i>Turdoides reinwardtii</i>                    | FMNH 396646   |                | Ghana        | JN826976 | JN827227 | JN826446 | -        | JN825951 |
| <i>Yuhina brunneiceps</i>                       | AMNH DOT5153  |                | Taiwan       | JN826980 | JN827230 | JN826450 | JN826200 | JN825954 |

**Table S2.** Samples used to reconstruct *Sholicola* phylogeny. All individuals of *Sholicola* were used for the within-species phylogeny but only the samples in bold were included in the higher-level analysis.

| Species                       | Sample Number  | Voucher no  | Locality          | Gene     |          |          |          |          |          |          |          |  |
|-------------------------------|----------------|-------------|-------------------|----------|----------|----------|----------|----------|----------|----------|----------|--|
|                               |                |             |                   | ND3      | CYTb     | ND2      | CO1      | MYO      | ODC      | GAPDH    | LDH      |  |
| <i>S. major</i>               | SW.A.1         | BR8(BR569)  | Ambalapara        | KR083727 | KR083719 | KY451838 | KY451880 |          |          |          |          |  |
| <i>S. major</i>               | SW.A.2         | BR9(BR571)  | Ambalapara        | KR083737 | KR083721 | KY451839 | KY451881 |          |          |          |          |  |
| <i>S. major</i>               | SW.A.3         | BR10(BR587) | Ambalapara        | KR083736 | KR083722 | KY451840 | KY451882 |          |          |          |          |  |
| <i>S. major</i>               | SW.A.4         | BN2/264507  | Banasura          | KR083726 | KR083725 | KY451841 | KY451883 |          |          |          |          |  |
| <i>S. major</i>               | SW.A.5         | BN3/264508  | Banasura          | KR083731 | KR083718 | KY451842 | KY451884 |          |          |          |          |  |
| <i>S. major</i>               | SW.A.6         | BN4/264509  | Banasura          | KR083729 | KR083716 | KY451843 | KY451885 |          |          |          |          |  |
| <i>S. major</i>               | SW.A.7         | VM1/264229  | Vellarimala       | KR083740 | KR083724 | KY451844 | KY451886 |          |          |          |          |  |
| <i>S. major</i>               | SW.A.8         | VM2/264230  | Vellarimala       | KR083743 | KR083720 | KY451845 | KY451887 |          |          |          |          |  |
| <i>S. major</i>               | SW.A.9         | VM4/264232  | Vellarimala       | KR083728 | KR083723 | KY451846 | KY451888 |          |          |          |          |  |
| <b><i>S. major</i></b>        | <b>SW.B.11</b> | <b>OT1</b>  | <b>Ooty</b>       | KR083733 | GU644540 | KY451847 | GU644540 | KY462737 | KY462754 | GU644507 | KY462739 |  |
| <i>S. major</i>               | SW.B.12        | OT2         | Ooty              | KR083746 | GU644574 | KY451848 | GU644541 |          |          |          |          |  |
| <i>S. major</i>               | SW.B.13        | KT4         | Kotagiri          | KR083732 | KR083717 | KY451849 | KY451889 |          |          |          |          |  |
| <i>S. major</i>               | Brmh01         |             | Brahmagiris       | KY462745 |          |          | KY451877 |          |          |          |          |  |
| <i>S. major</i>               | Brmh02         |             | Brahmagiris       | KY462746 |          |          | KY451878 |          |          |          |          |  |
| <i>S. major</i>               | Brmh03         |             | Brahmagiris       |          | KY462749 | KY462730 | KY451879 |          |          |          |          |  |
| <i>S. major</i>               | Brmh04         |             | Brahmagiris       |          | KY462750 |          |          |          |          |          |          |  |
| <i>S. major</i>               | Brmh06         |             | Brahmagiris       | KY462747 | KY462751 | KY462731 |          |          |          |          |          |  |
| <i>S. major</i>               | Brmh07         |             | Brahmagiris       | KY462748 |          | KY462732 |          |          |          |          |          |  |
| <i>S. major</i>               | Baba01         |             | Bababudan Hills   | KY462744 | GU644572 | KY462729 | GU644539 |          |          |          |          |  |
| <i>S. major</i>               | 1949Whil3659   |             | Bababudan Hills   | KY462735 | KY462736 |          | KY451891 |          |          |          |          |  |
| <i>S. major</i>               | 1949Whil3658   |             | Bababudan Hills   | KY462733 | KY462734 |          | KY451890 |          |          |          |          |  |
| <b><i>S. albiventris</i></b>  | <b>SW.C.15</b> | <b>GR4</b>  | <b>Grasshills</b> | KR083739 | GU644578 | KY451850 | GU644545 | KY462738 | KY462755 | GU644512 | KY462740 |  |
| <i>S. albiventris</i>         | SW.C.16        | GR5         | Grasshills        | KR083738 | GU644579 | KY451851 | GU644546 |          |          |          |          |  |
| <i>S. albiventris</i>         | SW.C.18        | KD1         | Kodikanal         | KR083745 | GU644582 | KY451852 | GU644549 |          |          |          |          |  |
| <i>S. albiventris</i>         | SW.C.19        | KD2         | Kodikanal         | KR083730 | GU644583 | KY451853 | GU644550 |          |          |          |          |  |
| <i>S. albiventris</i>         | SW.C.20        | HW2         | Highwadies        | KR083742 | GU644585 | KY451854 | GU644552 |          |          |          |          |  |
| <i>S. albiventris</i>         | SW.C.21        | HW5         | Highwadies        | KR083744 | GU644588 | KY451855 | GU644555 |          |          |          |          |  |
| <i>S. albiventris</i>         | SW.C.22        | HW6         | Highwadies        | KR083747 | GU644589 | KY451856 | GU644556 |          |          |          |          |  |
| <b><i>S. ashambuensis</i></b> | <b>SW.D.23</b> | <b>PR2</b>  | <b>Peppara</b>    | KR083734 | GU644596 | KY451857 | GU644563 |          | KY462756 | GU644530 |          |  |
| <i>S. ashambuensis</i>        | SW.D.24        | PR5         | Peppara           | KR083741 | GU644599 | KY451858 | GU644566 |          |          |          |          |  |
| <i>S. ashambuensis</i>        | SW.D.25        | PR6         | Peppara           | KR083735 | GU644600 | KY451859 | GU644567 |          |          |          |          |  |

[from published studies]

|                                              |  |  |                           |           |           |  |           |          |          |          |          |          |
|----------------------------------------------|--|--|---------------------------|-----------|-----------|--|-----------|----------|----------|----------|----------|----------|
| <i>Anthipes [Ficedula] monileger</i>         |  |  | Nepal - Bhojpur Distr.    | KJ456192  | KJ455321  |  |           | GU358730 | GU358860 | GU358995 | HM633446 |          |
| <i>Brachypteryx [Heteroxenicus] stellata</i> |  |  | China - Yunnan            | KJ456303  | KJ455459  |  |           |          |          | KJ455810 | KJ455053 | KJ454702 |
| <i>Brachypteryx [Myiomela] albiventris</i>   |  |  |                           | GU644586  | VV01      |  |           | VV01     |          |          | GU644536 | VV01     |
| <i>Brachypteryx [Myiomela] major</i>         |  |  |                           | GU644574  | VV03      |  |           | VV03     |          |          | GU644508 | VV03     |
| <i>Brachypteryx hyperythra</i>               |  |  | Bengal, Neora valley      | KJ456204  | KJ455334  |  |           |          |          |          |          |          |
| <i>Brachypteryx leucophrys</i>               |  |  | Indonesia - Java          | HM633263  | KJ455335  |  |           | HM633546 | HM633685 |          |          | HM633405 |
| <i>Brachypteryx montana</i>                  |  |  | Myanmar - Nat Ma Taung    | KJ456205  | KJ455336  |  |           | GU358707 | GU358835 | GU358970 | HM633406 |          |
| <i>Calliope [Luscinia] calliope</i>          |  |  |                           | NC_015074 | NC_015074 |  | NC_015074 |          |          |          |          |          |
| <i>Calliope [Luscinia] pectoralis</i>        |  |  | India; China              | KJ456329  | KJ455486  |  |           | HM633603 | HM633739 |          |          | HM633463 |
| <i>Cercomela fusca</i>                       |  |  |                           | GU055451  | GU055403  |  |           | HM633641 | HM633771 | GU358974 | HM633500 |          |
| <i>Cinclidium [Myiomela] leucurum</i>        |  |  | China - Yunnan            | KJ456358  | KJ455520  |  |           | GU358718 | GU358846 | GU358981 | HM633418 |          |
| <i>Cinclidium frontale</i>                   |  |  | Bengal, Neora valley      | KJ456230  | KJ455378  |  |           | GU358717 | GU358845 | GU358980 |          |          |
| <i>Cochoa purpurea</i>                       |  |  | India - Darjeeling        | KJ456236  | KJ455385  |  |           | KJ454779 | KJ455756 | KJ455002 |          |          |
| <i>Cochoa viridis</i>                        |  |  |                           | EU154587  | AY752336  |  |           | EU154698 | EU154812 |          |          |          |
| <i>Copsychus [Saxicoloides] fulicatus</i>    |  |  |                           | HM633377  | GU358823  |  |           | GU358764 | GU358894 | GU359029 | HM633518 |          |
| <i>Copsychus malabaricus</i>                 |  |  |                           | HM633277  | DQ466859  |  |           | HM120160 | GU358847 | GU358982 | HM633420 |          |
| <i>Copsychus saularis</i>                    |  |  | Bali; Nepal               | HM633278  | KJ455390  |  |           | GU358719 | GU358848 | GU358983 | HM633421 |          |
| <i>Cyanoptila cyanomelana</i>                |  |  |                           | NC_015074 | NC_015074 |  | NC_015074 |          |          |          |          |          |
| <i>Cyanoptila cyanomelana</i>                |  |  |                           | DQ365019  | GU358791  |  |           | GU358723 | HM633709 | GU358987 | HM633430 |          |
| <i>Cyornis [Rhinomyias] olivaceus</i>        |  |  |                           | HM633369  |           |  |           | HM633651 | HM633781 |          | HM633510 |          |
| <i>Cyornis [Rhinomyias] umbratilis</i>       |  |  |                           | HM633370  |           |  |           | HM633652 | HM633782 |          | HM633511 |          |
| <i>Cyornis banyumas</i>                      |  |  |                           | HM633287  |           |  |           | HM633570 | HM633710 |          | HM633431 |          |
| <i>Cyornis concretus</i>                     |  |  |                           | HM633288  |           |  |           | HM633571 | HM633711 |          | HM633432 |          |
| <i>Cyornis magnirostris</i>                  |  |  | Thailand - Chiang Mai     | KJ456246  | KJ455398  |  |           | KJ454785 | KJ455766 |          | KJ454690 |          |
| <i>Cyornis poliogenys</i>                    |  |  | India - Arunachal Pradesh | KJ456247  | KJ455399  |  |           | KJ454786 | KJ455767 | KJ455013 | KJ454691 |          |
| <i>Cyornis rubeculoides</i>                  |  |  | Myanmar - Chin Hills      | HM633290  | GU358792  |  |           | GU358724 | GU358853 | GU358988 | HM633433 |          |
| <i>Cyornis tickelliae</i>                    |  |  |                           | KJ456248  | KJ455400  |  |           | KJ454787 | KJ455768 | KJ455014 | KJ454692 |          |
| <i>Cyornis unicolor</i>                      |  |  |                           | HM633291  | KJ455401  |  |           | HM633574 | HM633713 |          | HM633434 |          |
| <i>Enicurus immaculatus</i>                  |  |  | Nepal - Bhojpur Distr.    | KJ456266  | KJ455421  |  |           |          |          |          |          |          |
| <i>Enicurus leschenaulti</i>                 |  |  | China - Yunnan            | KJ456267  | KJ455422  |  |           | GU358726 | GU358855 | GU358990 | HM633435 |          |
| <i>Enicurus maculatus</i>                    |  |  | Nepal; Vietnam            | KJ456268  | KJ455423  |  |           | KJ454800 | KJ455785 |          |          |          |
| <i>Enicurus schistaceus</i>                  |  |  | Nepal - Ilam              | KJ456269  | AY878287  |  |           | GU358727 | GU358856 | GQ369625 |          |          |
| <i>Enicurus scouleri</i>                     |  |  |                           | KJ456270  | KJ455424  |  |           |          | HM633716 |          | HM633437 |          |
| <i>Eumyias [Rhinomyias] additus</i>          |  |  |                           | HM633371  |           |  |           | HM633653 | HM633783 |          | HM633512 |          |
| <i>Eumyias albicaudatus</i>                  |  |  |                           | CU25      | CU25      |  |           | CU26     |          | CU25     | CU25     |          |
| <i>Eumyias indigo</i>                        |  |  |                           | HM633299  | FJ173369  |  |           | HM633581 | HM633721 |          | HM633442 |          |
| <i>Eumyias panayensis</i>                    |  |  |                           | HM633300  | FJ173382  |  |           | HM633582 |          |          |          |          |
| <i>Eumyias thalassinus</i>                   |  |  | Nepal - Malde             | KJ456274  | KJ455430  |  |           | GU358728 | GU358858 | GU358993 | HM633483 |          |
| <i>Ficedula [Muscicapella] hodgsoni</i>      |  |  | India, Arunachal Pradesh  | KJ456353  | KJ455516  |  |           | KJ454842 | KJ455841 | KJ455089 | KJ454713 |          |
| <i>Ficedula hyperythra</i>                   |  |  | India - Arunachal Pradesh | KJ456275  | KJ455431  |  |           | KJ454803 | KJ455790 | KJ455039 | HM633444 |          |
| <i>Ficedula sapphira</i>                     |  |  | Nepal - Ilam              | KJ456276  | GU358800  |  |           | GU358732 | GU358862 | GU358997 |          |          |
| <i>Ficedula strophiatea</i>                  |  |  | India                     | KJ456277  | KJ455432  |  |           | HM633590 | HM633727 |          | HM633450 |          |

| Species                                          | Sample Number | Voucher no | Locality                   | Gene      |           |           |           |          |          |          |     |          |
|--------------------------------------------------|---------------|------------|----------------------------|-----------|-----------|-----------|-----------|----------|----------|----------|-----|----------|
|                                                  |               |            |                            | ND3       | CYTb      | ND2       | COI       | MYO      | ODC      | GAPDH    | LDH |          |
| <i>Ficedula subrubra</i>                         |               |            | India - Jammu & Kashmir    |           | KJ456278  | KJ455433  |           | KJ454804 | KJ455791 |          |     |          |
| <i>Ficedula supercilialis</i>                    |               |            | India - Jammu & Kashmir    |           | KJ456279  | KJ455434  |           | KJ454805 | KJ455792 |          |     | HM633449 |
| <i>Ficedula tricolor</i>                         |               |            | India - Arunachal Pradesh  |           | KJ456280  | KJ455435  |           | HM633591 | KJ455793 | KJ455040 |     | HM633451 |
| <i>Ficedula westermanni</i>                      |               |            | Indonesia - Sulawesi       |           | KJ456281  | KJ455436  |           | GU358733 | GU358863 | GU358998 |     |          |
| <i>Ficedula zanthopygia</i>                      |               |            |                            | NC_015802 | NC_015802 | NC_015802 | NC_015802 |          |          |          |     |          |
| <i>Geokichla [Zoothera] citrina</i>              |               |            | China - Hainan             |           | KJ456515  | KJ455701  |           | GU358772 | GU358903 | GU359038 |     |          |
| <i>Geokichla [Zoothera] wardii</i>               |               |            | Sri Lanka - Boragasketiya  |           | EU874413  | EU874429  |           | KJ454943 | KJ455960 |          |     |          |
| <i>Larvivora [Luscinia] brunnea</i>              |               |            | India - Jammu & Kashmir    |           | KJ456328  | KJ455485  |           | HM633597 | HM633734 |          |     | HM633457 |
| <i>Luscinia [Hodgsonius] phaeincurviroides</i>   |               |            | Nepal - Humla Distr.       |           | KJ456307  | KJ455464  |           | KJ458736 | GU358866 | GU359001 |     | HM633455 |
| <i>Luscinia svecica</i>                          |               |            | Russia - Kirovskaya Oblast |           | HM633323  | KJ455487  |           | KJ454828 | KJ455826 |          |     | HM633465 |
| <i>Monticola cinclorhynchus</i>                  |               |            | Nepal - Kipsung            |           | HM633328  | KJ455505  |           |          |          |          |     | HM633470 |
| <i>Monticola rufiventris</i>                     |               |            |                            |           | GU237082  | EF434551  |           | HM633611 |          |          |     | HM633471 |
| <i>Monticola solitarius</i>                      |               |            |                            |           | KJ456346  | KJ455506  |           | GU358742 | GU358872 | GU359007 |     | HM633472 |
| <i>Muscicapra ferruginea</i>                     |               |            | India - Arunachal Pradesh  |           | HM633334  | KJ455513  |           | KJ454840 | KJ455839 | KJ455086 |     | HM633476 |
| <i>Muscicapra latirostris</i>                    |               |            | China - Hebei (nd2)        |           | KJ456350  | KJ455512  |           | KJ454839 | KJ455838 | KJ455085 |     | KJ454712 |
| <i>Muscicapra sibirica</i>                       |               |            | India - Jammu & Kashmir    |           | KJ456352  | KJ455515  |           | KJ454841 | KJ455840 | KJ455088 |     | HM633481 |
| <i>Myadestes obscurus</i>                        |               |            |                            |           | AF295080  | DQ469608  |           |          |          |          |     |          |
| <i>Myadestes unicolor</i>                        |               |            | Mexico - Veracruz          |           | AF295086  | DQ469613  |           | HM633626 | HM633757 | KJ455091 |     | KJ454715 |
| <i>Myophonus caeruleus</i>                       |               |            | Nepal - Gothichaur valley  |           | KJ456359  | KJ455521  |           | GU358750 | HM633758 | GU359014 |     |          |
| <i>Niltava davidi</i>                            |               |            |                            |           | HM633352  |           |           | HM633634 | HM633765 |          |     | HM633493 |
| <i>Niltava grandis</i>                           |               |            | Myanmar - Chin State       |           | KJ456362  | KJ455524  |           | KJ454845 | KJ455843 | KJ455094 |     | HM633494 |
| <i>Niltava macgrigoriae</i>                      |               |            | India - Arunachal Pradesh  |           | KJ456363  | KJ455525  |           | KJ454846 | KJ455844 |          |     | HM633495 |
| <i>Niltava sundara</i>                           |               |            | Nepal - Bhojpur Distr.     |           | KJ456364  | KJ455526  |           | GU358753 | GU358883 | GU359018 |     | HM633496 |
| <i>Niltava vivida</i>                            |               |            |                            |           | HM633356  |           |           | HM633638 | HM633769 |          |     | HM633497 |
| <i>Oenanthe albonigra</i>                        |               |            |                            |           | GU055468  | GU055420  |           |          |          |          |     |          |
| <i>Oenanthe deserti</i>                          |               |            |                            |           | GU237095  | GU237121  |           | GU358754 | GU358884 | GU359019 |     |          |
| <i>Oenanthe picata</i>                           |               |            |                            |           | GU055487  | GU055439  |           |          |          |          |     |          |
| <i>Oenanthe pleschanka</i>                       |               |            |                            |           | EU154593  | GU055441  |           | EU154705 | EU154819 |          |     |          |
| <i>Phoenicurus [Chaimarrornis] leucocephalus</i> |               |            | Nepal - Humla Distr.       |           | KJ456223  | KJ455369  |           | GU358714 | GU358842 | GU358977 |     | HM633416 |
| <i>Phoenicurus [Rhyacornis] fuliginosus</i>      |               |            | China - Sichuan            |           | HM633372  | KJ455627  |           | GU358761 | GU358891 | GU359026 |     | HM633513 |
| <i>Phoenicurus caeruleocephala</i>               |               |            | India - Himachal Pradesh   |           | KJ456385  | KJ455550  |           |          |          |          |     |          |
| <i>Phoenicurus erythrogastrus</i>                |               |            | Captivity                  |           | KJ456386  | KJ455551  |           | GU358756 | GU358886 | GU359021 |     |          |
| <i>Phoenicurus frontalis</i>                     |               |            | Nepal - Rasuwa Distr.      |           | KJ456387  | KJ455552  |           | HM633645 | HM633775 |          |     | HM633504 |
| <i>Phoenicurus ochruros</i>                      |               |            | China - Qinghai            |           | HM633365  | KJ455553  |           | HM633647 | HM633777 |          |     | HM633506 |
| <i>Phoenicurus schisticeps</i>                   |               |            | Captivity                  |           | KJ456388  | KJ455554  |           |          | KJ455862 |          |     | KJ454721 |
| <i>Saxicola caprata</i>                          |               |            | Indonesia - Sulawesi       |           | KJ456454  | KJ455631  |           | HM633655 | HM633785 | KJ455165 |     | HM633514 |
| <i>Saxicola ferreus</i>                          |               |            | India - Uttar Pradesh      |           | KJ456455  | KJ455632  |           | GU358762 | GU358892 | GU359027 |     | HM633515 |
| <i>Saxicola jerdoni</i>                          |               |            | Thailand - Chiang Rai      |           | EU427504  | KJ455633  |           |          |          |          |     |          |
| <i>Saxicola leucurus</i>                         |               |            | India - Punjab             |           | HM633375  | KJ455634  |           | HM633657 | HM633786 |          |     | HM633516 |
| <i>Saxicola torquatus</i>                        |               |            | Nepal - Kipsung            |           | KJ456456  | KJ455635  |           | KJ454901 | KJ455912 | KJ455166 |     | HM633517 |
| <i>Tarsiger chrysaeus</i>                        |               |            | India - Himachal Pradesh   |           | HM633387  | KJ455663  |           | HM633668 | HM633797 |          |     | HM633528 |
| <i>Tarsiger hyperythrus</i>                      |               |            | Nepal - Rupchet            |           | HM633389  | KJ455664  |           | HM633670 | HM633799 |          |     | HM633530 |
| <i>Tarsiger indicus</i>                          |               |            | China - Yunnan             |           | HM633390  | KJ455665  |           | HM633671 | HM633800 |          |     | HM633531 |
| <i>Tarsiger rufilatus</i>                        |               |            | India; China               |           | KJ456484  | KJ455666  |           | KJ454922 | KJ455934 | KJ455193 |     | KJ454734 |
| <i>Turdus albocinctus</i>                        |               |            |                            |           | EU154601  | DQ911064  |           | EU154713 | EU154828 |          |     |          |
| <i>Turdus boulboul</i>                           |               |            |                            |           | EU154606  | DQ911068  |           | KJ454939 | EU154833 |          |     |          |
| <i>Turdus maximus</i>                            |               |            |                            |           | EU154635  | KJ455692  |           | EU154746 | EU154861 |          |     |          |
| <i>Turdus rubrocanus</i>                         |               |            |                            |           | KJ456507  | KJ455693  |           | EU154561 | EU154896 |          |     |          |
| <i>Turdus unicolor</i>                           |               |            | Nepal - Kipsung            |           | EU154679  | KJ455694  |           | EU154792 | EU154907 |          |     |          |
| <i>Turdus viscivorus</i>                         |               |            |                            |           | EU154680  | DQ911121  |           | EU154793 | EU154908 | GU359037 |     |          |
| <i>Zoothera dauma</i>                            |               |            | China - Hebei              |           | KJ456516  | KJ455702  |           | GU358773 | GU358904 | GU359039 |     |          |
| <i>Zoothera dixonii</i>                          |               |            |                            |           | EU154685  | AY752320  |           | EU154798 | EU154913 |          |     |          |
| <i>Zoothera marginata</i>                        |               |            |                            |           | AY752367  | AY752325  |           | KF269265 | KF269275 |          |     |          |
| <i>Zoothera mollissima</i>                       |               |            | Nepal - Gongga             |           | KJ456517  | KJ455703  |           | KF269266 | KF269276 | KJ455218 |     |          |
| <i>Zoothera monticola</i>                        |               |            | Nepal - Parbat Distr.      |           | KJ456518  | KJ455704  |           | EU154800 | EU154915 | KJ455219 |     |          |

**Table S3. Morphometric variation in *Montecincla* species**

| Species & Region             | N   | Tarsus<br>(Mean, range)  | Bill<br>(Mean, range)    | Wing<br>(Mean, range)    | Tail<br>(Mean, range)     | Weight (Mean, range)    |
|------------------------------|-----|--------------------------|--------------------------|--------------------------|---------------------------|-------------------------|
| <i>M. jerdoni</i> – [A]      | 21  | 31.58<br>(30.27 - 33.29) | 21.48<br>(18.2 - 24.16)  | 82.87<br>(69.00– 86.00)  | 88.22<br>(74.33 – 93.00)  | 41.14<br>(36.00– 48.00) |
| <i>M. cachinnans</i> – [B]   | 32  | 31.87<br>(27.00 - 36.83) | 20.94<br>(18.59 - 23.67) | 85.85<br>(80.00 - 94.3)  | 92.75<br>(70.00 - 100.33) | 43.54<br>(37.00– 58.00) |
| <i>M. fairbanki</i> – [C]    | 103 | 33.31<br>(29.12 - 36.82) | 22.07<br>(16.57 - 26.27) | 86.05<br>(80.00 - 92.67) | 89.34<br>(59.00 - 98.33)  | 44.34<br>(38 – 59.00)   |
| <i>M. meridionalis</i> – [D] | 38  | 34.30<br>(31.04 - 36.71) | 23.34<br>(19.71 - 26.62) | 87.82<br>(82.00– 94.00)  | 91.18<br>(84 - 110)       | 51.42<br>(44.00– 59.00) |

**Table S4. Morphometric variation in *Sholicola* species**

| Species & Region             | N  | Tarsus<br>(mean, range)  | Wing<br>(mean, range)    | Tail<br>(mean, range)   | Bill<br>(mean, range)    | Weight<br>(mean, range)  |
|------------------------------|----|--------------------------|--------------------------|-------------------------|--------------------------|--------------------------|
| <i>S. major</i> – [A]        | 45 | 27.23<br>(19.47-31.10)   | 79.86<br>(70.33 – 86.00) | 64.39<br>(59.00– 79.00) | 17.85<br>(14.58 - 19.74) | 24.97<br>(17.75 – 29.00) |
| <i>S. major</i> – [B]        | 42 | 27.86<br>(21.67-31.67)   | 81.12<br>(74.67 - 89.33) | 64.63<br>(58.00– 81.00) | 17.43<br>(13.15 - 21.33) | 24.84<br>(20.00– 29.00)  |
| <i>S. albiventris</i> – [C]  | 76 | 28.22<br>(25.66 - 31.36) | 76.95<br>(69.67 – 84.00) | 63.35<br>(56.00– 79.00) | 17.40<br>(13.32 - 20.08) | 22.87<br>(17.00– 32.00)  |
| <i>S. ashambuensis</i> – [D] | 21 | 26.95<br>(24.7 - 28.5)   | 76.16<br>(71.00– 83.00)  | 60.73<br>(52.00– 68.00) | 18.12<br>(16.5 - 19.64)  | 24.07<br>(18.19 - 27.50) |

**Table S5. *Montecincla* song variation in the Western Ghat Sky Islands (mean, SE, range)**

|                                          | <i>M. jerdoni</i><br>N=7    | <i>M. cachinnans</i><br>N=3 | <i>M. fairbanki</i><br>N=6 | <i>M. meridionale</i><br>N=7 |
|------------------------------------------|-----------------------------|-----------------------------|----------------------------|------------------------------|
| <b>No. notes per song</b>                | 9.42, 2.78,<br>3-25         | 11, 2.5,<br>8-16            | 6.34, 1.45,<br>3-13        | 11.42, 3.27,<br>3-27         |
| <b>Note length (seconds)</b>             | 0.1609, 0.008,<br>0.01-0.39 | 0.19, 0.009,<br>0.06-0.35   | 0.27, 0.01,<br>0.08-0.52   | 0.23, 0.006,<br>0.12-0.49    |
| <b>Song bandwidth (kHz)</b>              | 0.80, 0.02,<br>0.56-1.46    | 0.91, 0.19,<br>0.59-1.48    | 0.95, 0.03,<br>0.61-1.46   | 0.61, 0.008,<br>0.39-0.97    |
| <b>Song delivery rate (notes/second)</b> | 2, 0.86,<br>1-4             | 2.34, 0.6,<br>1-4           | 1.5, 0.32,<br>1-2          | 2.57, 0.2,<br>1-5            |
| <b>Phrase length seconds</b>             | 5.97, 1.11,<br>0.1-34.93    | 1.84, 0.32,<br>0.2-8.513    | 0.785, 0.1,<br>0.72-2.79   | 2.14, 0.27,<br>0.3-13.53     |

**Table S6. *Sholicola* song variation in the Western Ghat Sky Islands (mean, SE, range)**

|                                          | <i>S. major</i>          | <i>S. albiventris</i>   | <i>S. ashambuensis</i>   |
|------------------------------------------|--------------------------|-------------------------|--------------------------|
| <b>No. notes per song</b>                | 6.7, 0.25,<br>3-17       | 13.3, 0.57,<br>3-34     | 9.3, 0.36,<br>2-32       |
| <b>Note length (seconds)</b>             | 0.36, 0.01,<br>0.19-0.62 | 0.21, 0.01,<br>0.09-0.4 | 0.25, 0.01,<br>0.08-0.35 |
| <b>Song bandwidth (kHz)</b>              | 3.6, 0.12,<br>0.81-6.7   | 5.5, 0.01,<br>2.3-7.9   | 4.9, 0.01,<br>2.6-6.9    |
| <b>Song delivery rate (notes/second)</b> | 2.8, 0.08,<br>0.04-5.0   | 4.7, 0.42,<br>2.6-7.8   | 4.2, 0.12,<br>0.94-7.6   |
| <b>Phrase length (seconds)</b>           | 2.5, 0.10,<br>1.2-5.8    | 2.9, 0.10,<br>0.8-6.3   | 2.4, 0.13,<br>0.8-6.7    |

**Table S7. Comparison of morphometric measurements of *Sholicola ashambuensis* and *S. albiventris***

|               | <i>Sholicola albiventris</i> |       |         | <i>Sholicola ashambuensis</i> |       |         |
|---------------|------------------------------|-------|---------|-------------------------------|-------|---------|
|               | N                            | Mean  | Std Dev | N                             | Mean  | Std Dev |
| <b>Tarsus</b> | 76                           | 28.22 | 1.04    | 21                            | 26.95 | 0.93    |
| <b>Wing</b>   | 76                           | 76.95 | 3.21    | 21                            | 76.16 | 3.45    |
| <b>Bill</b>   | 76                           | 17.40 | 1.49    | 21                            | 18.12 | 0.74    |
| <b>Tail</b>   | 75                           | 63.35 | 4.17    | 21                            | 60.73 | 4.23    |



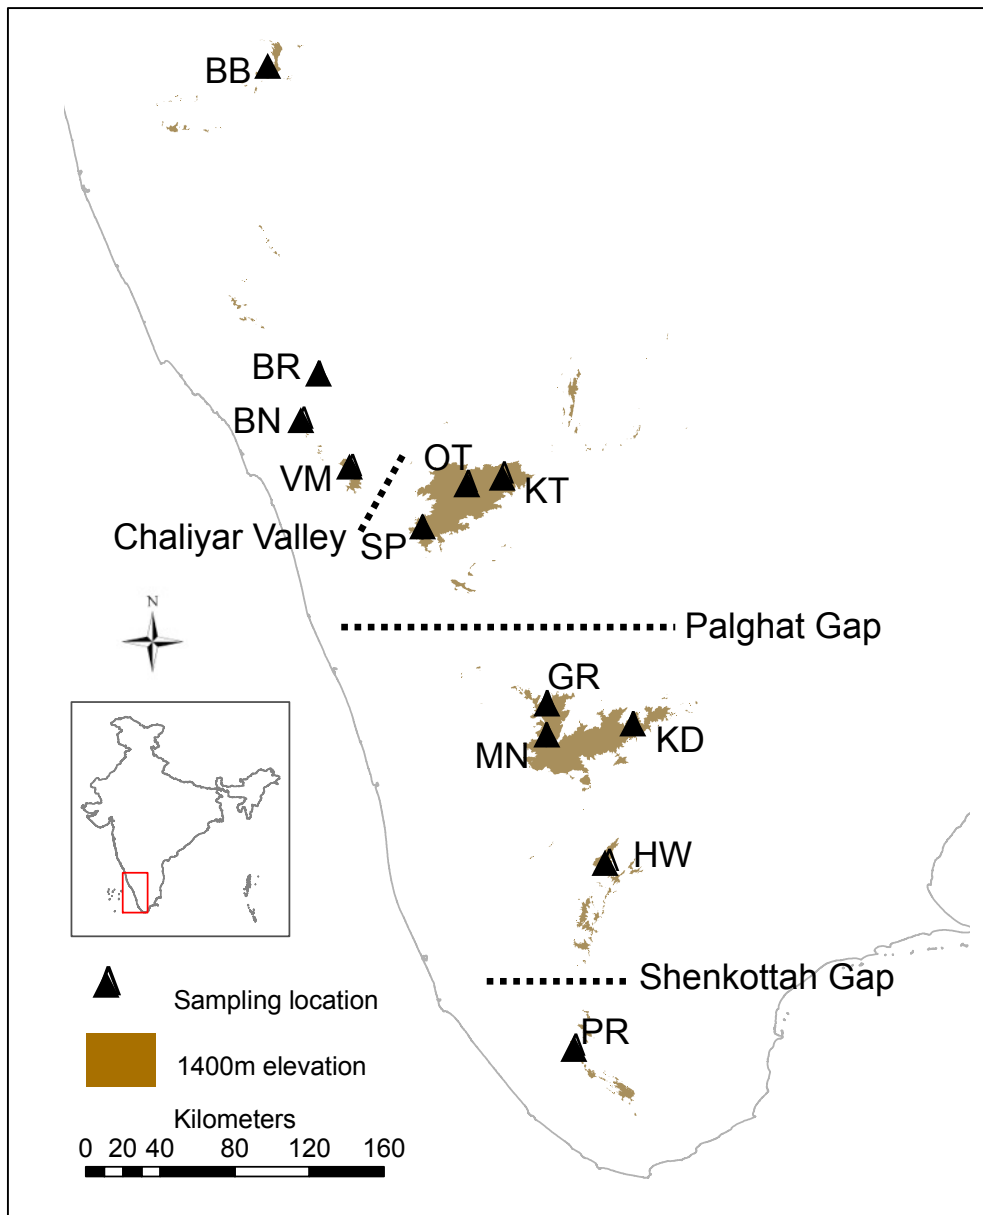

**Figure S1.** Sample collection sites across the sky islands of the Western Ghats. Two letter codes refer to: BB- Bababudan Hills; BR – Brahmagiris; BN – Banasura; VM – Vellarimala; SP – Sispara; OT – Ooty; KT – Kotagiri; GR – Grasshills; MN – Munnar; KD – Kodaikanal; HW - Highwavies (Meghamalai); PR - Peppara (Ashambu hills).

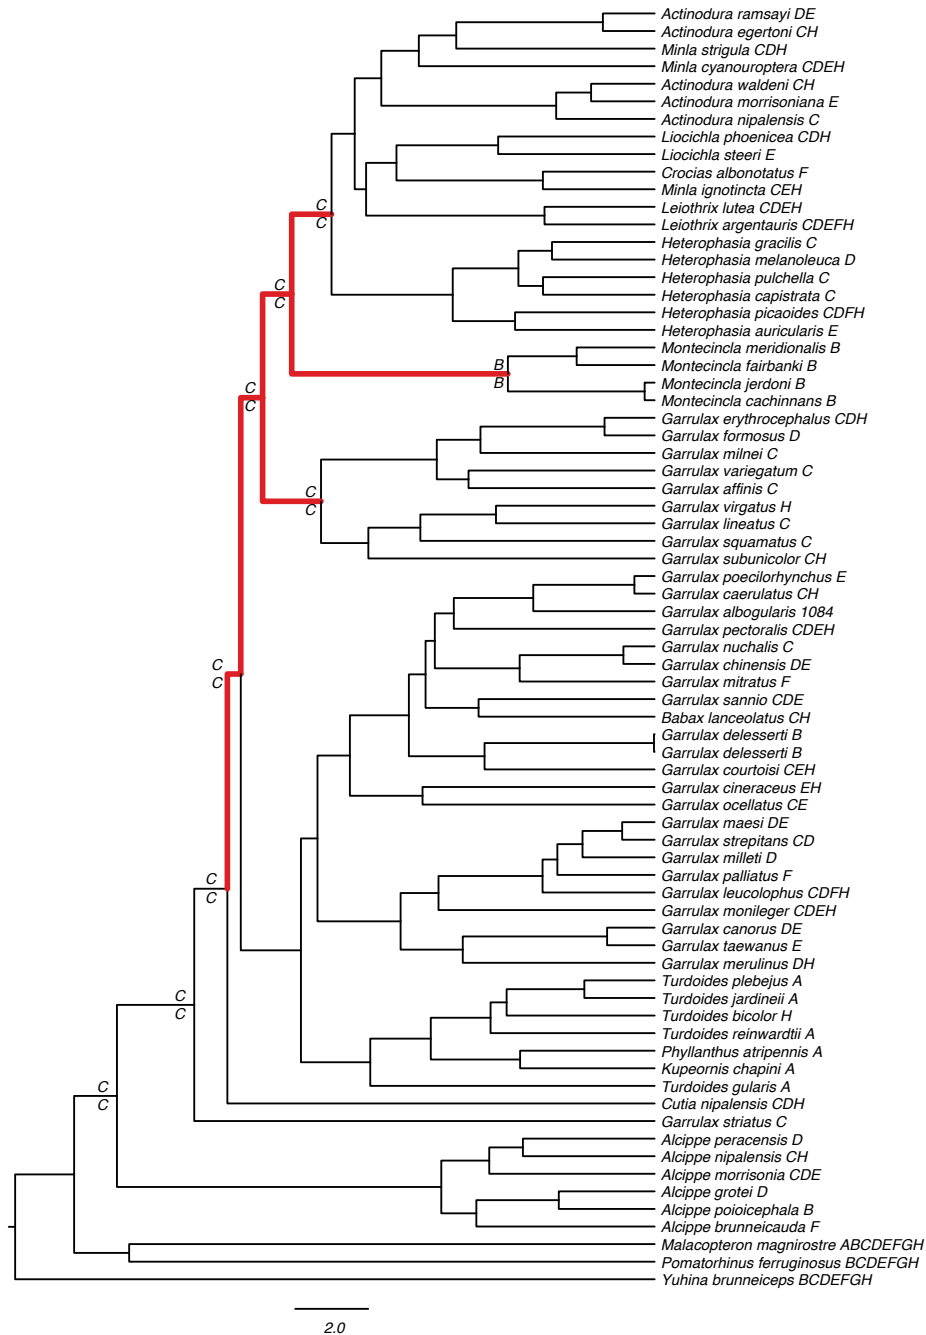

**Figure S2.** Ancestral area analysis using Lagrange for *Montecincla*. Area codes for terminal taxa are A-Africa, B-peninsular India, C-Himalayas, D-Southeast Asia, E-China, F-Sundaland, G-Philippines, and H-Assam. The most likely ancestral range reconstruction for relevant nodes (in red) are shown.

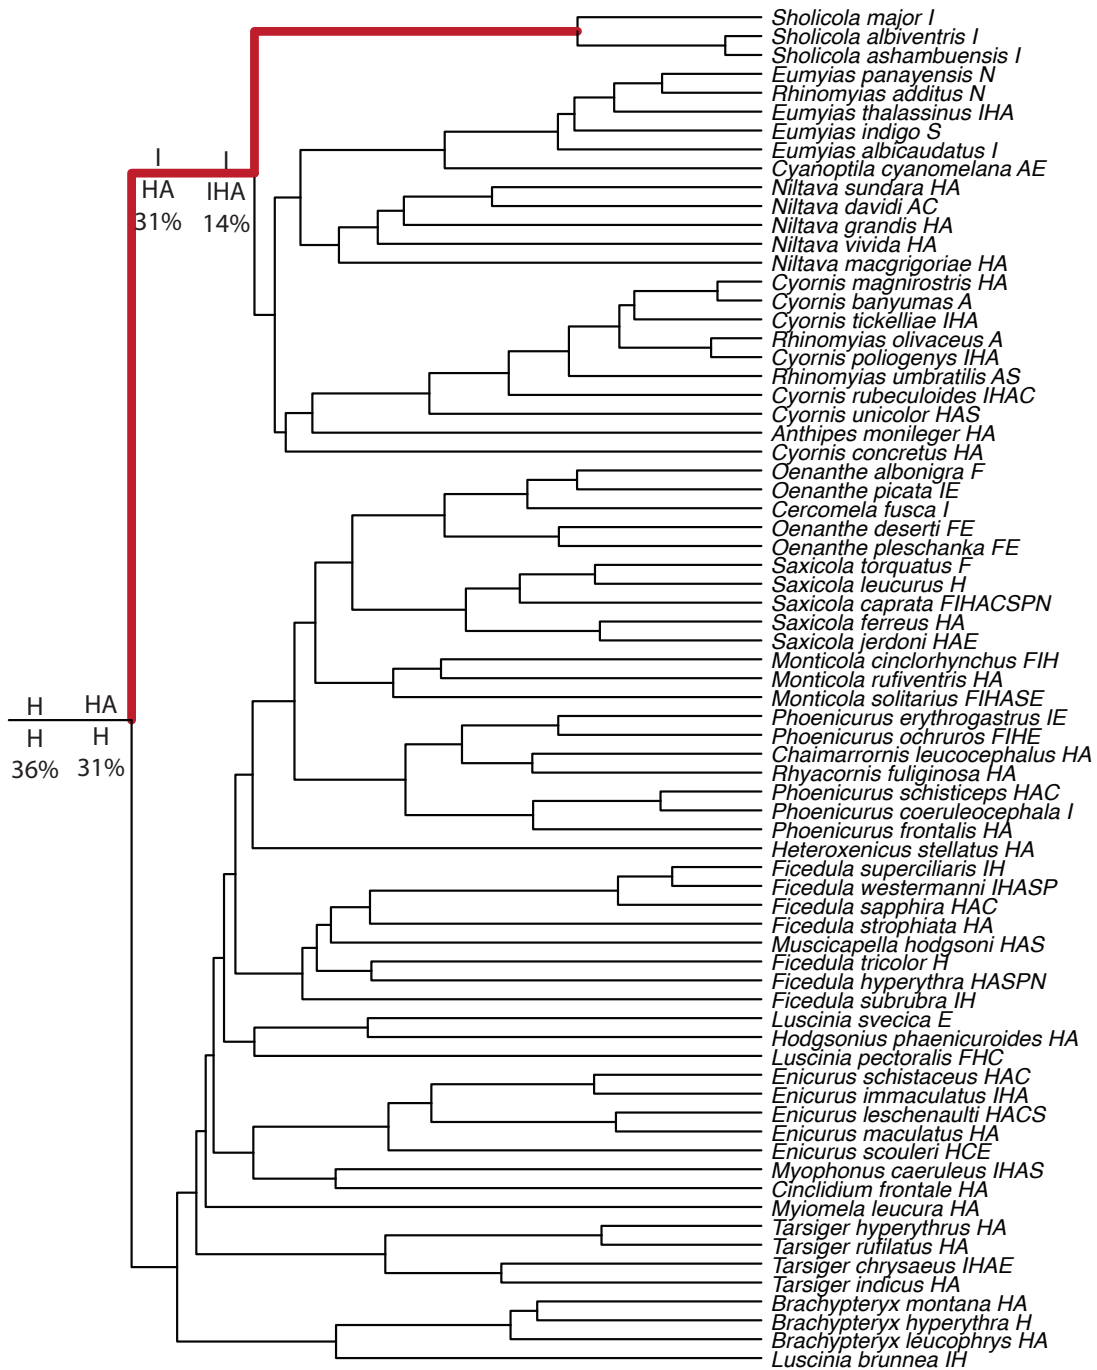

**Figure S3.** Ancestral area analysis using Lagrange for *Sholicola*. Area codes for terminal taxa are I-Peninsular India, H-Himalayas, A-Southeast Asia, D-Eurasia, E-Australasia F-Africa + Southwest Asia, C-China, S-Sundaland, P-Philippines, E-Eurasia, and N-Australasia/New World. The most likely ancestral range reconstruction for relevant nodes (in red) are shown with their relative probabilities.

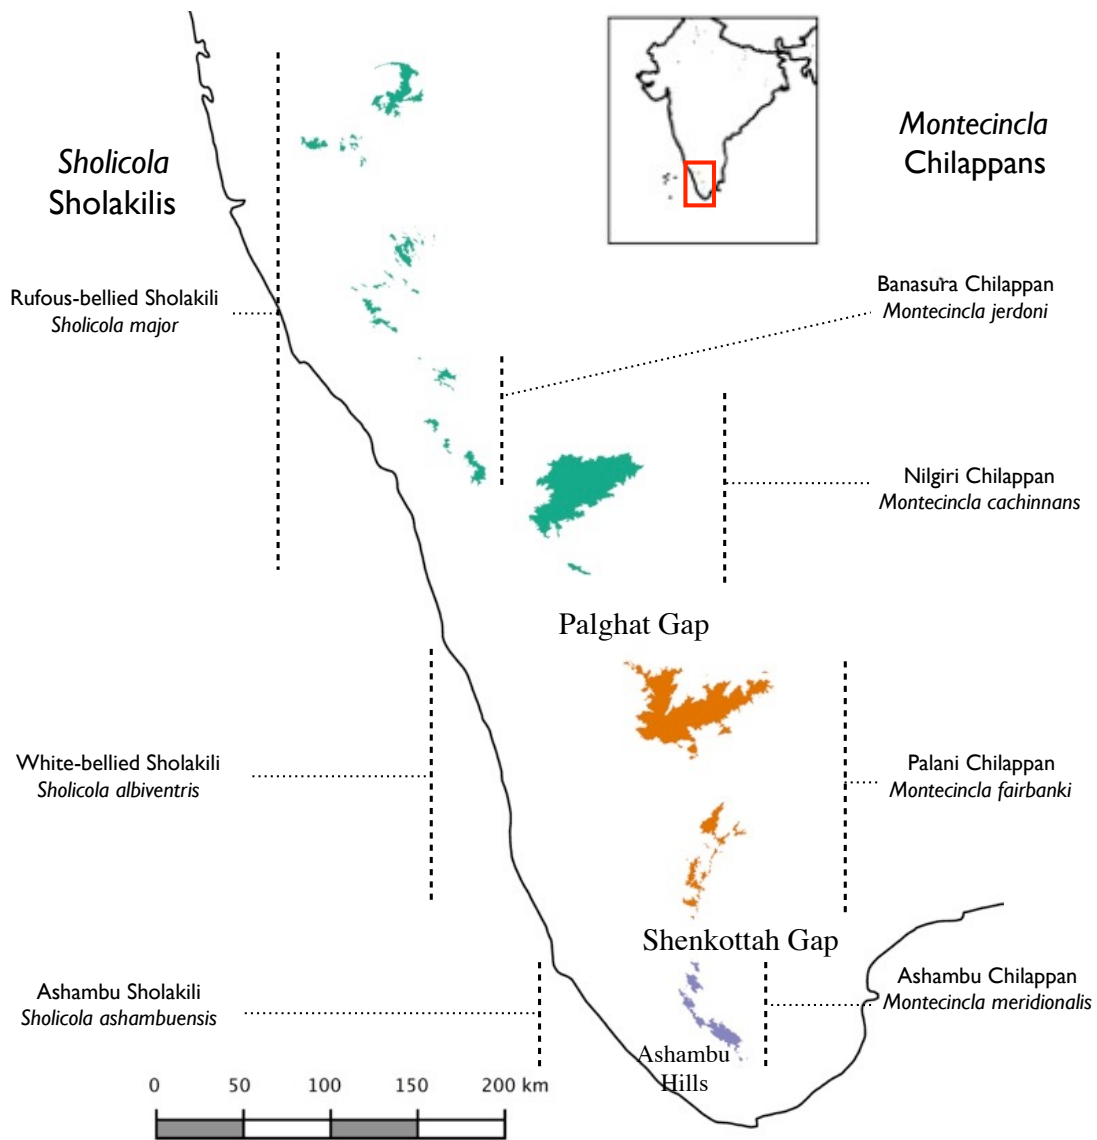

**Figure S4.** Map showing the allopatric distribution of *Montecincla* chilappans and *Sholicola* sholakilis.

a)

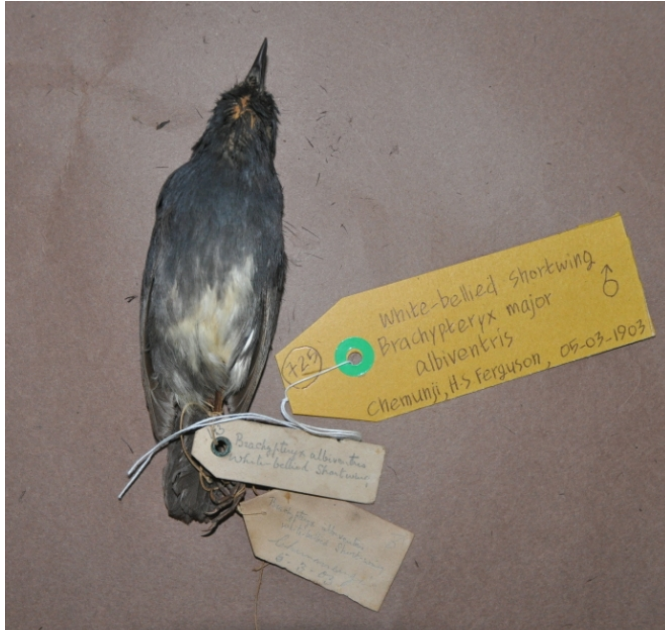

b)

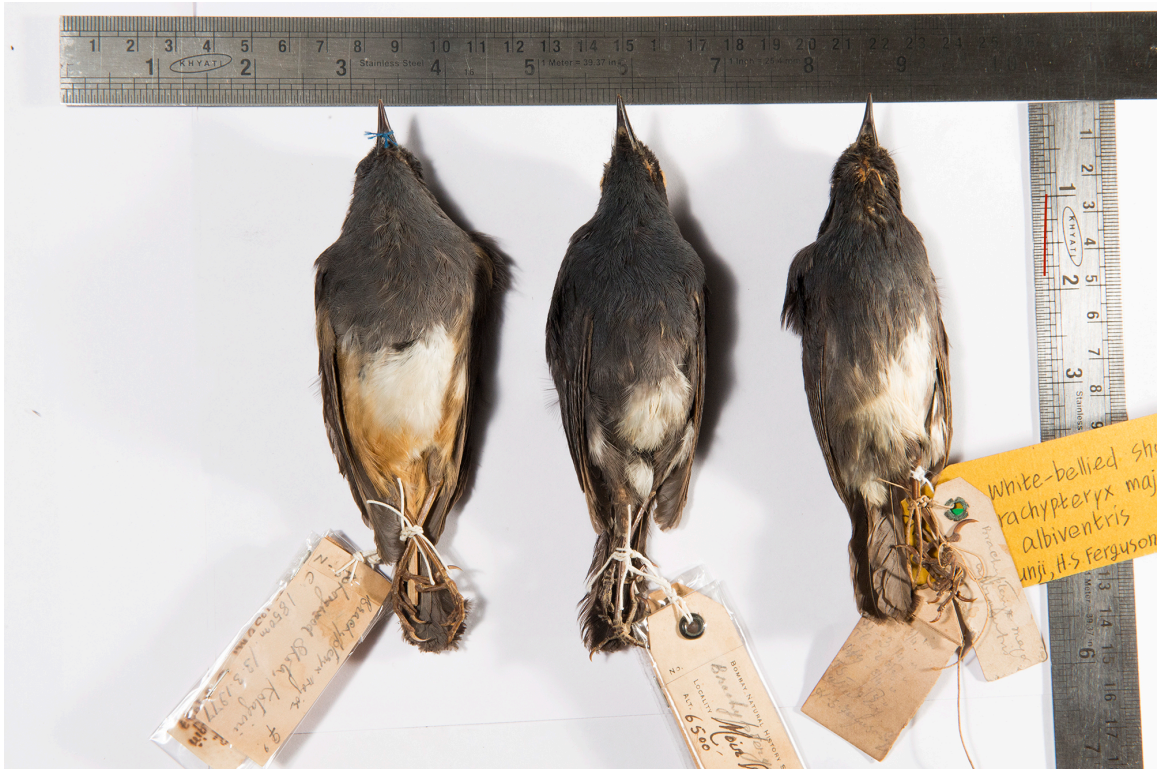

**Figure S5.** Photographs of *Sholicola ashambuensis* sp. nov.; a) holotype in the Trivandrum Museum of Natural History; b) in comparison with other members of *Sholicola*: *S. ashambuensis* (right), with larger white belly contrasted with *S. albiventris* (middle), *S. major* (left).

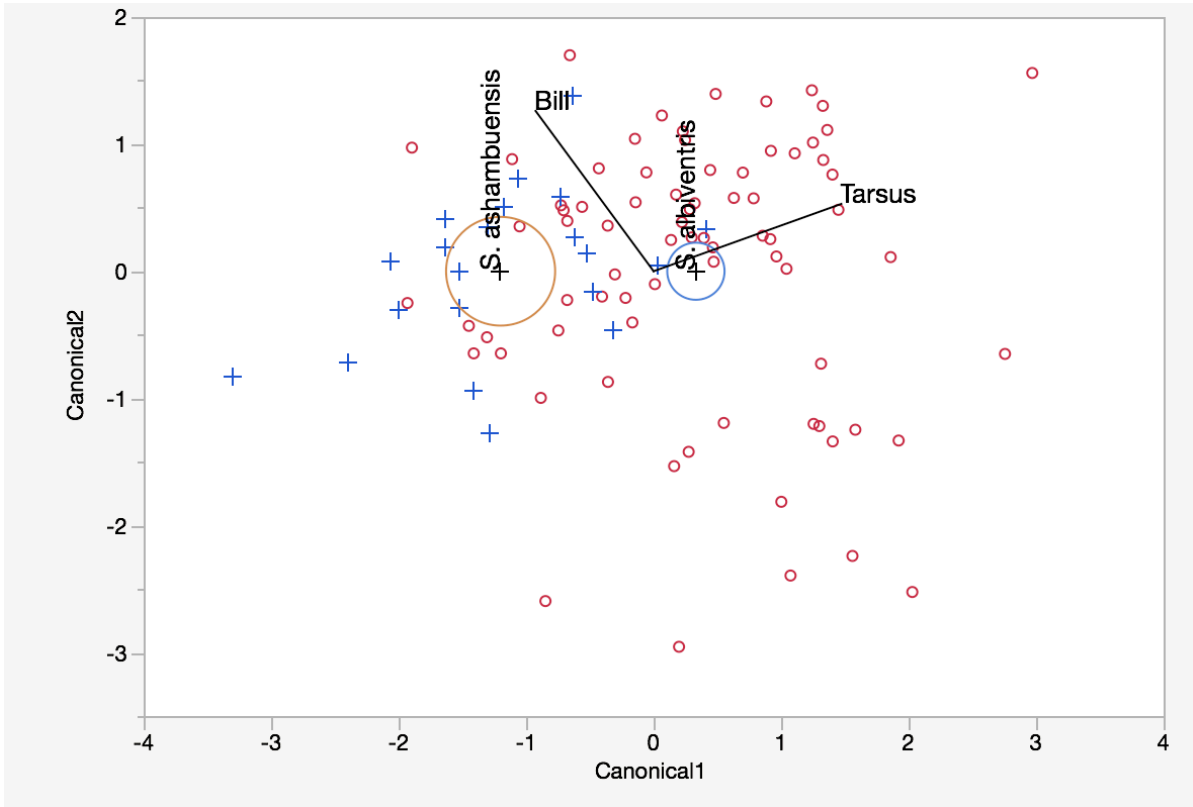

**Figure S6.** a) Discriminant Function Analysis of morphometric differences between *Sholicola ashambuensis* and *S. albiventris* based on 97 individuals shows 79.4% accurate classification and significant differences in the means (non overlapping 95% confidence interval circles).

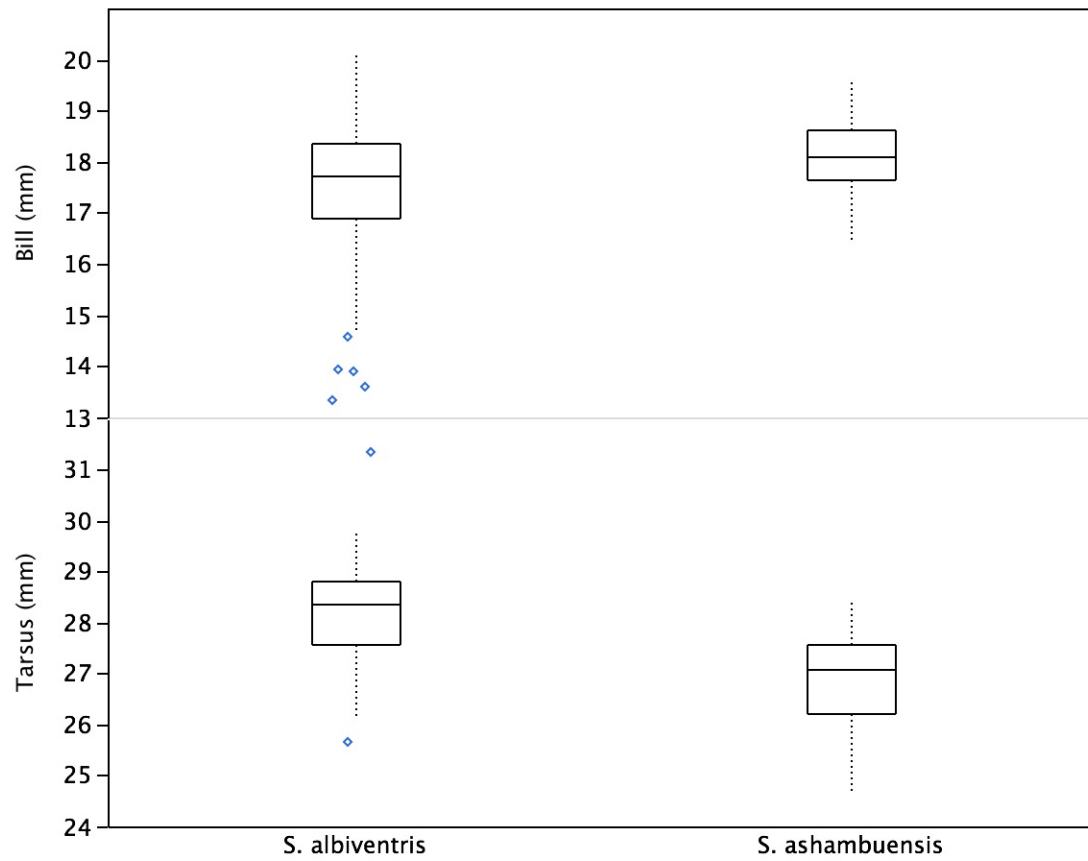

**Figure S6. b)** Box plots showing morphometric differences in bill and tarsus lengths in *Sholicola ashambuensis* and *S. albiventris*.

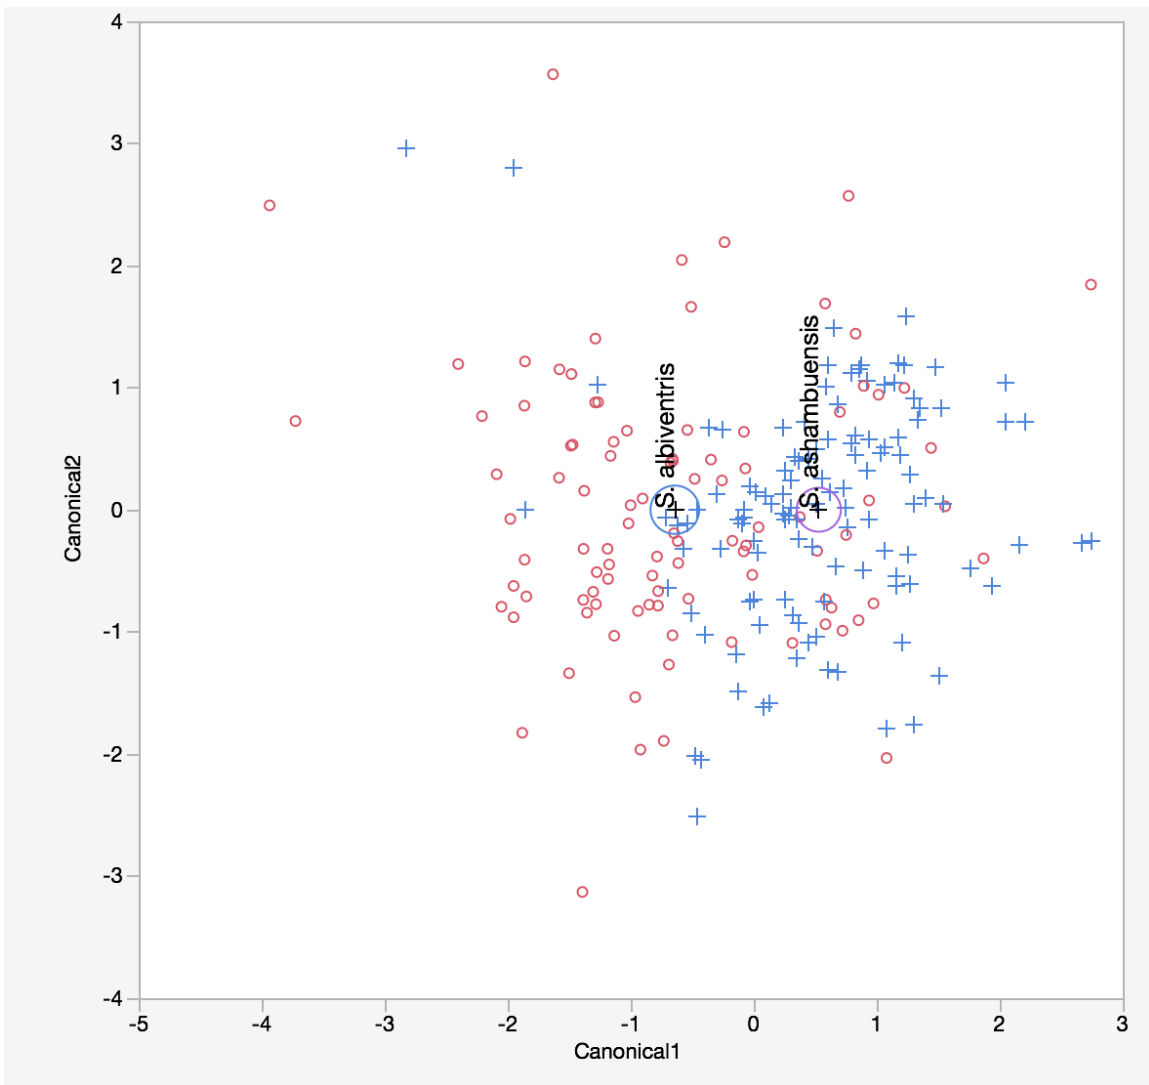

**Figure S7. Discriminant Function Analysis of *Sholicola ashambuensis* and *S. albiventris* songs based on 217 song recordings shows 80% accurate classification and significant differences in the means (non-overlapping 95% confidence interval circles).**
